# Supplementary material for: Chalkophore-mediated respiratory oxidase flexibility controls M. tuberculosis virulence
Source: eLife. 2025 Jun 5;14:RP105794. doi: 10.7554/eLife.105794 (PMC12140626; doi:10.7554/eLife.105794)
Supplement: Figure 1—source data 1. [file elife-105794-fig1-data1.xlsx]

## Sheet: Figure1B
	WT+vector	WT+vector	WT+vector	Δnrp+vector	Δnrp+vector	Δnrp+vector	Δnrp+nrp	Δnrp+nrp	Δnrp+nrp
10µM TTM	4.04738	2.77995	0.712312	4.45535	4.30282	3.46002	1.86492	0.807091	1.8979
25µM TTM	0.979194		2.60613	10.66		10.3957	2.13663	1.48006	1.48006
50µM TTM		4.53566	8.71139	10.6446	15.3931	11.1567	1.97733	1.81494	2.68803

## Sheet: Figure1C
	WT+vector	WT+vector	WT+vector	Δnrp+vector	Δnrp+vector	Δnrp+vector	Δnrp+nrp	Δnrp+nrp	Δnrp+nrp
DMSO	1	1	1	1.35752	1.55096	1.24361	0.974624	1.1848	0.828581
20µM TTM	15.7241	14.698	14.0988	23.6009	30.3209	29.0611	22.4406	21.8992	20.8278

## Sheet: Figure1D
	WT+vector	WT+vector	WT+vector	Δnrp+vector	Δnrp+vector	Δnrp+vector	Δnrp+nrp	Δnrp+nrp	Δnrp+nrp
DMSO	0.74	1.059	1.254	0.351	0.809	1.24	0.388	0.776	1.168
10µM TTM	0.809	1.007	1.268	0.122	0.752	0.857	0.39	0.779	1.295
20µM TTM	0.695	0.913	1.111	0.04	0.197	0.183	0.19	0.749	1.04
50µM TTM	0.04	0.608	0.387	0.012	0.048	0.035	0.043	0.457	0.307
