# Supplementary material for: Chalkophore-mediated respiratory oxidase flexibility controls M. tuberculosis virulence
Source: eLife. 2025 Jun 5;14:RP105794. doi: 10.7554/eLife.105794 (PMC12140626; doi:10.7554/eLife.105794)
Supplement: Figure 2—figure supplement 1—source data 1. [file elife-105794-fig2-figsupp1-data1.xlsx]

## Sheet: Panel C
	WT	WT	WT	fadD10	fadD10	fadD10	cydAB	cydAB	cydAB	fadD10cydAB	fadD10cydAB	fadD10cydAB
no Chelator	120000	80000	100000	60000	100000	60000	100000	100000	60000	60000	60000	60000
1mM BCS	40000	140000	40000	20000	10000	40000	140000	100000	40000	0.2	0.2	0.2
40µM TTM	80000	60000	60000	20000	10000	20000	100000	120000	100000	0.2	0.2	0.2
