# Supplementary material for: Chalkophore-mediated respiratory oxidase flexibility controls M. tuberculosis virulence
Source: eLife. 2025 Jun 5;14:RP105794. doi: 10.7554/eLife.105794 (PMC12140626; doi:10.7554/eLife.105794)
Supplement: Figure 2—figure supplement 2—source data 1. [file elife-105794-fig2-figsupp2-data1.xlsx]

## Sheet: A
DMSO	20µM TTM	20µM TTM+10µM diisonitrile
0.839	0.041	0.724
0.823	0.029	0.76
0.825	0.015	0.666
0.816	0.012	0.66
0.63	0.013	0.434
0.707	0.013	0.431

## Sheet: B
day	WT+vector DMSO	WT+vector DMSO	WT+vector DMSO	WT+vector DMSO	WT+vector DMSO	WT+vector DMSO	WT+vector 20µM TTM	WT+vector 20µM TTM	WT+vector 20µM TTM	WT+vector 20µM TTM	WT+vector 20µM TTM	WT+vector 20µM TTM
0	0.003	0.003	0.004	0.003	0.002	0.004	0.003	0.012	0.004	0.005	0.006	0.009
3	0.045	0.03	0.075	0.065	0.054	0.052	0.035	0.033	0.056	0.061	0.034	0.037
4	0.143	0.13	0.242	0.219	0.163	0.161	0.109	0.083	0.191	0.158	0.108	0.127
5	0.31	0.306	0.382	0.363	0.296	0.275	0.279	0.257	0.359	0.326	0.219	0.26
6	0.424	0.436	0.516	0.501	0.426	0.41	0.406	0.412	0.521	0.513	0.356	0.405
7	0.546	0.567	0.627	0.615	0.532	0.514	0.541	0.558	0.636	0.638	0.454	0.503
10	0.779	0.824	0.817	0.826	0.744	0.75	0.787	0.812	0.848	0.863	0.686	0.719
11	0.851	0.899	0.871	0.878			0.853	0.882	0.9	0.914
12	0.903	0.953	0.914	0.919	0.847	0.847	0.905	0.941	0.942	0.955	0.8	0.829
13	0.962	1.008	0.954	0.964			0.958	0.989	0.986	0.998
14	1.002	1.043	1	1.003	0.867	0.871	0.996	1.027	1.024	1.032	0.836	0.858

## Sheet: C
day	Δnrp+vector DMSO	Δnrp+vector DMSO	Δnrp+vector DMSO	Δnrp+vector DMSO	Δnrp+vector DMSO	Δnrp+vector DMSO	Δnrp+vector DMSO	Δnrp+vector 20µM TTM	Δnrp+vector 20µM TTM	Δnrp+vector 20µM TTM	Δnrp+vector 20µM TTM	Δnrp+vector 20µM TTM	Δnrp+vector 20µM TTM
0	0.003	0.004	0.004	0.004	0.005	0.005	0.004	0.004	0.004	0.004	0.004	0.006	0.006
3	0.022	0.043	0.044	0.048	0.062	0.063	0.034	0.026	0.015	0.017	0.018	0.013	0.012
4	0.07	0.128	0.138	0.125	0.126	0.145	0.085	0.052	0.024	0.029	0.032	0.024	0.025
5	0.173	0.269	0.277	0.265	0.218	0.259	0.151	0.088	0.042	0.051	0.056	0.039	0.037
6	0.277	0.364	0.395	0.384	0.336	0.378	0.218	0.133	0.058	0.083	0.091	0.066	0.065
7	0.385	0.48	0.501	0.496	0.43	0.469	0.297	0.195	0.093	0.126	0.136	0.092	0.081
10	0.683	0.752	0.74	0.768	0.678	0.723	0.5	0.421	0.274	0.326	0.341	0.243	0.235
11	0.771	0.83	0.814	0.835			0.568	0.498	0.355	0.397	0.41
12	0.839	0.888	0.871	0.885	0.809	0.833	0.616	0.554	0.416	0.453	0.465	0.374	0.364
13	0.914	0.949	0.922	0.933			0.669	0.601	0.475	0.506	0.518
14	0.962	0.985	0.983	0.985	0.841	0.857	0.709	0.645	0.532	0.551	0.562	0.416	0.415

## Sheet: D
day	cydAB+vector DMSO	cydAB+vector DMSO	cydAB+vector DMSO	cydAB+vector DMSO	cydAB+vector DMSO	cydAB+vector DMSO	cydAB+vector 20µM TTM	cydAB+vector 20µM TTM	cydAB+vector 20µM TTM	cydAB+vector 20µM TTM	cydAB+vector 20µM TTM	cydAB+vector 20µM TTM
0	0.004	0.005	0.005	0.004	0.001	0.005	0.004	0.003	0.006	0.004	0.005	0.004
3	0.033	0.033	0.056	0.049	0.045	0.026	0.03	0.026	0.037	0.031	0.019	0.017
4	0.085	0.086	0.179	0.144	0.117	0.07	0.09	0.074	0.098	0.091	0.036	0.029
5	0.215	0.201	0.312	0.271	0.231	0.147	0.215	0.183	0.218	0.201	0.068	0.049
6	0.331	0.307	0.466	0.421	0.369	0.289	0.325	0.298	0.355	0.335	0.162	0.111
7	0.468	0.449	0.588	0.55	0.48	0.405	0.457	0.427	0.487	0.452	0.279	0.229
10	0.801	0.787	0.861	0.859	0.782	0.721	0.79	0.766	0.807	0.779	0.627	0.588
11	0.904	0.88	0.944	0.94			0.881	0.858	0.894	0.859
12	0.972	0.945	0.999	0.988	0.929	0.868	0.939	0.92	0.948	0.91	0.803	0.764
13	1.04	1.009	1.041	1.04			0.998	0.974	0.997	0.96
14	1.078	1.047	1.094	1.085	0.964	0.91	1.037	1.01	1.037	0.999	0.869	0.833

## Sheet: E
day	nrpcydAB+nrp DMSO	nrpcydAB+nrp DMSO	nrpcydAB+nrp DMSO	nrpcydAB+nrp DMSO	nrpcydAB+nrp DMSO	nrpcydAB+nrp DMSO	nrpcydAB+nrp 20µM TTM	nrpcydAB+nrp 20µM TTM	nrpcydAB+nrp 20µM TTM	nrpcydAB+nrp 20µM TTM	nrpcydAB+nrp 20µM TTM	nrpcydAB+nrp 20µM TTM
0	0.004	0.004	0.003	0.004	0.005	0.004	0.003	0.004	0.004	0.005	0.006	0.005
3	0.034	0.044	0.017	0.015	0.04	0.021	0.019	0.028	0.008	0.008	0.008	0.016
4	0.083	0.126	0.055	0.047	0.1	0.039	0.035	0.074	0.027	0.029	0.008	0.022
5	0.209	0.248	0.196	0.141	0.212	0.1	0.101	0.211	0.058	0.097	0.015	0.042
6	0.321	0.357	0.348	0.296	0.349	0.236	0.218	0.334	0.152	0.222	0.024	0.096
7	0.459	0.503	0.487	0.432	0.46	0.354	0.373	0.475	0.301	0.359	0.103	0.197
10	0.785	0.824	0.8	0.765	0.79	0.694	0.718	0.804	0.653	0.7	0.471	0.561
11	0.889	0.915	0.896	0.858			0.82	0.893	0.756	0.804
12	0.963	0.976	0.96	0.921	0.94	0.851	0.892	0.948	0.833	0.87	0.686	0.756
13	1.034	1.04	1.014	0.986			0.962	1.01	0.906	0.931
14	1.074	1.079	1.065	1.032	0.982	0.907	1.012	1.055	0.97	0.982	0.775	0.834

## Sheet: F
day	nrpcydAB+cydABDC DMSO	nrpcydAB+cydABDC DMSO	nrpcydAB+cydABDC DMSO	nrpcydAB+cydABDC DMSO	nrpcydAB+cydABDC DMSO	nrpcydAB+cydABDC DMSO	nrpcydAB+cydABDC 20µM TTM	nrpcydAB+cydABDC 20µM TTM	nrpcydAB+cydABDC 20µM TTM	nrpcydAB+cydABDC 20µM TTM	nrpcydAB+cydABDC 20µM TTM	nrpcydAB+cydABDC 20µM TTM
0	0.004	0.004	0.004	0.004	0.004	0.002	0.004	0.004	0.004	0.004	0.005	0.004
3	0.02	0.021	0.037	0.011	0.025	0.021	0.003	0.002	0.003	0.004	0.009	0.002
4	0.062	0.058	0.105	0.025	0.043	0.042	0.004	0.004	0.004	0.006	0.016	0.003
5	0.176	0.176	0.24	0.104	0.098	0.118	0.004	0.005	0.003	0.005	0.023	0.005
6	0.275	0.289	0.366	0.261	0.201	0.238	0.005	0.007	0.011	0.016	0.037	0.006
7	0.396	0.421	0.484	0.389	0.316	0.342	0.009	0.017	0.023	0.032	0.041	0.01
10	0.669	0.697	0.732	0.661	0.601	0.636	0.044	0.148	0.087	0.1	0.141	0.037
11	0.771	0.79	0.809	0.756			0.11	0.218	0.138	0.15
12	0.846	0.861	0.87	0.831	0.748	0.779	0.164	0.271	0.182	0.186	0.234	0.122
13	0.93	0.935	0.926	0.893			0.211	0.326	0.239	0.246
14	0.988	0.987	0.982	0.955	0.803	0.832	0.261	0.38	0.282	0.288	0.294	0.154
