# Supplementary material for: Chalkophore-mediated respiratory oxidase flexibility controls M. tuberculosis virulence
Source: eLife. 2025 Jun 5;14:RP105794. doi: 10.7554/eLife.105794 (PMC12140626; doi:10.7554/eLife.105794)
Supplement: Figure 2—figure supplement 3—source data 1. [file elife-105794-fig2-figsupp3-data1.xlsx]

## Sheet: Panel A
day	WT+vector	WT+vector	WT+vector	WT+vector	WT+vector	WT+vector	nrp+vector	nrp+vector	nrp+vector	nrp+vector	nrp+vector	nrp+vector	ctaD+vector	ctaD+vector	ctaD+vector	ctaD+vector	ctaD+vector	ctaD+vector	nrpctaD+vector	nrpctaD+vector	nrpctaD+vector	nrpctaD+vector	nrpctaD+vector	nrpctaD+vector	nrpctaD+ctaDALFA	nrpctaD+ctaDALFA	nrpctaD+ctaDALFA	nrpctaD+ctaDALFA	nrpctaD+ctaDALFA	nrpctaD+ctaDALFA	nrpctaD+nrp	nrpctaD+nrp	nrpctaD+nrp	nrpctaD+nrp	nrpctaD+nrp	nrpctaD+nrp
0	0.005	0.005	0.005	0.005	0.005	0.005	0.005	0.005	0.005	0.005	0.005	0.005	0.005	0.005	0.005	0.005	0.005	0.005	0.005	0.005	0.005	0.005	0.005	0.005	0.005	0.005	0.005	0.005	0.005	0.005	0.005	0.005	0.005	0.005	0.005	0.005
3	0.098	0.104	0.104	0.096	0.108	0.11	0.078	0.084	0.072	0.102	0.092	0.09	0.012	0.016	0.01	0.008	0.01	0.012	0.008	0.012	0.014	0.008	0.016	0.03	0.086	0.096	0.07	0.07	0.062	0.068	0.014	0.012	0.008	0.006	0.012	0.022
5			0.558	0.496	0.558	0.522			0.318	0.31	0.39	0.394			0.014	0.01	0.026	0.026			0.016	0.01	0.016	0.02			0.316	0.318	0.316	0.338			0.01	0.014	0.02	0.028
7	1.04	0.996	1.088	0.964	1.044	1.012	0.758	0.758	0.764	0.768	0.882	0.886	0.056	0.028	0.032	0.02	0.03	0.028	0.018	0.024	0.012	0.012	0.026	0.026	0.71	0.716	0.788	0.724	0.854	0.794	0.022	0.028	0.016	0.028	0.028	0.032
10	1.748	1.824	1.616	1.884	1.76	1.816	1.596	1.588	1.62	1.504	1.784	1.744	0.06	0.052	0.06	0.072	0.064	0.068	0.036	0.034	0.048	0.04	0.048	0.04	1.46	1.432	1.456	1.572	1.852	1.708	0.036	0.05	0.032	0.036	0.06	0.056
12			2.28	1.988	2.232	2.172			1.904	2.028	2.216	2.164			0.124	0.096	0.132	0.128			0.052	0.044	0.084	0.104			1.976	1.888	2.12	2.38			0.052	0.048	0.104	0.112
14	2.448	2.428	2.232	2.592	2.492	2.492	2.264	2.304	2.376	2.16	2.488	2.54	0.162	0.18	0.192	0.192	0.24	0.216	0.076	0.072	0.08	0.084	0.12	0.12	2.204	2.184	2.14	2.304	2.728	2.508	0.102	0.09	0.084	0.08	0.176	0.172

## Sheet: Panel B
day	WT+vector	WT+vector	WT+vector	WT+vector	WT+vector	WT+vector	nrp+vector	nrp+vector	nrp+vector	nrp+vector	nrp+vector	nrp+vector	ctaD+vector	ctaD+vector	ctaD+vector	ctaD+vector	ctaD+vector	ctaD+vector	nrpctaD+vector	nrpctaD+vector	nrpctaD+vector	nrpctaD+vector	nrpctaD+vector	nrpctaD+vector	nrpctaD+ctaDALFA	nrpctaD+ctaDALFA	nrpctaD+ctaDALFA	nrpctaD+ctaDALFA	nrpctaD+ctaDALFA	nrpctaD+ctaDALFA	nrpctaD+nrp	nrpctaD+nrp	nrpctaD+nrp	nrpctaD+nrp	nrpctaD+nrp	nrpctaD+nrp
0	0.005	0.005	0.005	0.005	0.005	0.005	0.005	0.005	0.005	0.005	0.005	0.005	0.005	0.005	0.005	0.005	0.005	0.005	0.005	0.005	0.005	0.005	0.005	0.005	0.005	0.005	0.005	0.005	0.005	0.005	0.005	0.005	0.005	0.005	0.005	0.005
3	0.038	0.042	0.054	0.054	0.05	0.044	0.02	0.022	0.03	0.04	0.042	0.036	0.022	0.018	0.03	0.01	0.01	0.012	0.01	0.012	0.008	0.01	0.04	0.014	0.032	0.024	0.026	0.024	0.02	0.026	0.014	0.014	0.008	0.012	0.012	0.016
5			0.332	0.358	0.302	0.28			0.07	0.064	0.088	0.08			0.016	0.014	0.024	0.022			0.012	0.012	0.02	0.02			0.06	0.066	0.05	0.052			0.012	0.012	0.028	0.026
7	0.782	0.738	0.928	0.972	0.75	0.772	0.114	0.106	0.148	0.132	0.18	0.16	0.032	0.034	0.036	0.024	0.03	0.026	0.024	0.034	0.02	0.02	0.022	0.024	0.112	0.108	0.136	0.168	0.106	0.096	0.036	0.028	0.016	0.02	0.026	0.042
10	1.624	1.684	1.764	1.768	1.6	1.596	0.28	0.308	0.392	0.344	0.476	0.508	0.088	0.074	0.052	0.052	0.06	0.064	0.036	0.036	0.068	0.036	0.044	0.044	0.292	0.348	0.38	0.352	0.3	0.308	0.054	0.052	0.04	0.036	0.06	0.068
12			2.216	2.168	2.02	2.048			0.576	0.632	0.824	0.768			0.096	0.096	0.136	0.12			0.052	0.064	0.068	0.068			0.52	0.628	0.58	0.552			0.056	0.104	0.104	0.1
14	2.484	2.428	2.512	2.524	2.344	2.348	0.796	0.752	0.956	0.82	1.028	1.064	0.252	0.256	0.184	0.172	0.208	0.216	0.102	0.09	0.092	0.072	0.108	0.108	0.752	0.724	0.928	0.804	0.776	0.812	0.13	0.118	0.08	0.104	0.156	0.152
