# Supplementary material for: Chalkophore-mediated respiratory oxidase flexibility controls M. tuberculosis virulence
Source: eLife. 2025 Jun 5;14:RP105794. doi: 10.7554/eLife.105794 (PMC12140626; doi:10.7554/eLife.105794)
Supplement: Figure 3—figure supplement 1—source data 3. [file elife-105794-fig3-figsupp1-data3.xlsx]

## Sheet: Panel C
	WT	WT	WT	WT	WT	WT	nrp	nrp	nrp	nrp	nrp	nrp	nrp + nrp	nrp + nrp	nrp + nrp	nrp + nrp	nrp + nrp	nrp + nrp
No Addition	100000	100000	300000	100000	300000	300000	100000	300000	200000	50000	40000	40000	100000	100000	400000	200000	20000	70000
15 µM ND	300000	500000	100000	50000	40000	200000	500000	400000	300000	20000	200000	100000	40000	80000	60000	100000	300000	60000
40 µM TTM	200000	400000	100000	100000	100000	100000	10000	30000	20000	40000	60000	60000	200000	40000	70000	100000	100000	10000
15 µM ND + 40 µM TTM	200000	100000	100000	200000	200000	300000	200	300	600	100	100	100	50000	60000	30000	100000	200000	50000
