# Supplementary material for: Chalkophore-mediated respiratory oxidase flexibility controls M. tuberculosis virulence
Source: eLife. 2025 Jun 5;14:RP105794. doi: 10.7554/eLife.105794 (PMC12140626; doi:10.7554/eLife.105794)
Supplement: Figure 3—source data 1. [file elife-105794-fig3-data1.xlsx]

## Sheet: Figure3B
		DMSO	DMSO	DMSO	DMSO	DMSO	DMSO	DMSO	DMSO	DMSO	DMSO	DMSO	DMSO	DMSO	DMSO	DMSO	DMSO	DMSO	DMSO	5 µM ND	5 µM ND	5 µM ND	5 µM ND	5 µM ND	5 µM ND	5 µM ND	5 µM ND	5 µM ND	5 µM ND	5 µM ND	5 µM ND	5 µM ND	5 µM ND	5 µM ND	5 µM ND	5 µM ND	5 µM ND	100 nM Q203	100 nM Q203	100 nM Q203	100 nM Q203	100 nM Q203	100 nM Q203	100 nM Q203	100 nM Q203	100 nM Q203	100 nM Q203	100 nM Q203	100 nM Q203
day 0	0	20.9																		20.9																		20.9
day 1	1	9.7	11.7	10.8	10.9	11.2	11	14.7	18.5	18.3	15	12.4	13.3	11.4	14.3	11.1	13.6	14.6	12.8	14.5	17.7	17.3	16.5	10.6	10.9	10.5	12.5	13.3	14.5	17.7	17.3	11.1	11.2	11.3	11.9	11.9	15.4	16.5	18.4	16.4	14.4	14	11.6	16.5	10.6	10.9	10.3	14.1	14.2
day 2	2	7.8	7.3	8.5	9.5	11	11.6	6.8	9.7	8.8	8.8	8.3	8.4	0.01	0.01	0.01	7.8	6.3	7.1	9.6	10.8	8.8	8.3	9.1	9.6	10.1	9.9	8.4	10.4	12.7	12	4.8	4.6	5.2	4.5	4.4	5.6	13.3	11.6	11.6	10.1	11.6	15.5	13	16.8	16.8	10.9	10.6	11
day 3	3	0.01	0.01	0.01	0.01	0.01	0.01	0.01	0.01	0.01	0.01	0.01	0.01	0.01	0.01	0.01	0.01	0.01	0.01	0.01	0.01	0.01	0.01	0.01	0.01	0.01	0.01	0.01	0.01	0.01	0.01	0.01	0.01	0.01	0.01	0.01	0.01	8.7	9.9	10.6	9.5	7.1	7.8	7.3	7	12.6	13.6	15.6	10.7
day 4	4	0.01	0.01	0.01	0.01	0.01	0.01	0.01	0.01	0.01	0.01	0.01	0.01	0.01	0.01	0.01	0.01	0.01	0.01	0.01	0.01	0.01	0.01	0.01	0.01	0.01	0.01	0.01	0.01	0.01	0.01	0.01	0.01	0.01	0.01	0.01	0.01	3.6	3.8	4.5	3.9	3.9	3.5	5.2	5.3	5.7	4.7	5.8	5.1
day 5	5	0.01	0.01	0.01	0.01	0.01	0.01	0.01	0.01	0.01	0.01	0.01	0.01	0.01	0.01	0.01	0.01	0.01	0.01	0.01	0.01	0.01	0.01	0.01	0.01	0.01	0.01	0.01	0.01	0.01	0.01	0.01	0.01	0.01	0.01	0.01	0.01	0.01	0.01	0.01	0.01	0.01	0.01	0.01	0.01	0.01	0.01	0.01	0.01
day 6	6	0.01	0.01	0.01	0.01	0.01	0.01	0.01	0.01	0.01	0.01	0.01	0.01	0.01	0.01	0.01	0.01	0.01	0.01	0.01	0.01	0.01	0.01	0.01	0.01	0.01	0.01	0.01	0.01	0.01	0.01	0.01	0.01	0.01	0.01	0.01	0.01	0.01	0.01	0.01	0.01	0.01	0.01	0.01	0.01	0.01	0.01	0.01	0.01
[truncated: 21 more columns]

## Sheet: Figure3C
		wt DMSO	wt DMSO	wt DMSO	wt DMSO	wt DMSO	wt DMSO	wt DMSO	wt DMSO	wt DMSO	wt DMSO	wt DMSO	wt DMSO	wt DMSO	wt DMSO	wt DMSO	wt DMSO	wt DMSO	wt DMSO	wt 25 µM TTM	wt 25 µM TTM	wt 25 µM TTM	wt 25 µM TTM	wt 25 µM TTM	wt 25 µM TTM	wt 25 µM TTM	wt 25 µM TTM	wt 25 µM TTM	wt 25 µM TTM	wt 25 µM TTM	wt 25 µM TTM	wt 25 µM TTM	wt 25 µM TTM	wt 25 µM TTM	wt 25 µM TTM	wt 25 µM TTM	wt 25 µM TTM	nrp DMSO	nrp DMSO	nrp DMSO	nrp DMSO	nrp DMSO	nrp DMSO	nrp DMSO	nrp DMSO	nrp DMSO	nrp DMSO	nrp DMSO	nrp DMSO
day 0	0	20.9																		20.9
day 1	1	11.4	10.6	10.9	13.2	11.4	12.8	15.3	12.9	15.8	11.1	11.6	13.8	11.4	14.3	11.1	13.6	14.6	12.8	15	13.3	14.1	13.4	12.7	14.9	20.6	21.6	12.7	12.9	14.5	17.2	12.8	13.4	16.4	17.2	14.4	19.5	11.5	13.1	14.4	11.7	18	12.4	11.5	13.1	14.4	11.7	18	12.4
day 2	2	12.3	10.7	8.5	8.5	8.4	11.1	12.9	13	12.7	9.9	13.6	12	0.01	0.01	0.01	7.8	6.3	7.1	10.4	9.3	9.2	8.8	9.5	8.6	12.3	11.6	11.2	10.1	10.1	9.9	11.6	12.9	13.8	12	12.1	13.9	11.6	12	8.5	10.6	9.2	12.9	11.6	12	8.5	10.6	9.2	12.9
day 3	3							0.08	0.15	0.14	0.01	0.01	0.01	0.01	0.01	0.01	0.01	0.01	0.01							8.8	10	10	8.1	8.2	8.8	4.9	9.3	8	12.9	11.5	16.1	0.01	0.01	0.01	0.01	0.01	0.01	0.01	0.01	0.01	0.01	0.01	0.01
day 4	4	0.01	0.01	0.01	0.01	0.01	0.01	0.01	0.01	0.01	0.01	0.01	0.01	0.01	0.01	0.01	0.01	0.01	0.01	0.01	0.01	0.01	0.01	0.01	0.01	5.7	5.3	6.8	3.6	3.7	3.9	6.6	5.9	6.8	6.7	5.6	5.6	0.01	0.01	0.01	0.01	0.01	0.01	0.01	0.01	0.01	0.01	0.01	0.01
day 5	5	0.01	0.01	0.01	0.01	0.01	0.01	0.01	0.01	0.01	0.01	0.01	0.01	0.01	0.01	0.01	0.01	0.01	0.01	0.01	0.01	0.01	0.01	0.01	0.01	0.01	0.01	0.01	0.01	0.01	0.01	0.01	0.01	0.01	0.01	0.01	0.01	0.01	0.01	0.01	0.01	0.01	0.01	0.01	0.01	0.01	0.01	0.01	0.01
day 6	6	0.01	0.01	0.01	0.01	0.01	0.01	0.01	0.01	0.01	0.01	0.01	0.01	0.01	0.01	0.01	0.01	0.01	0.01	0.01	0.01	0.01	0.01	0.01	0.01	0.01	0.01	0.01	0.01	0.01	0.01	0.01	0.01	0.01	0.01	0.01	0.01	0.01	0.01	0.01	0.01	0.01	0.01	0.01	0.01	0.01	0.01	0.01	0.01
[truncated: 24 more columns]

## Sheet: Figure3D
		wt DMSO	wt DMSO	wt DMSO	wt DMSO	wt DMSO	wt DMSO	wt DMSO	wt DMSO	wt DMSO	wt DMSO	wt DMSO	wt DMSO	wt DMSO	wt DMSO	wt DMSO	wt DMSO	wt DMSO	wt DMSO	wt 25 µM TTM	wt 25 µM TTM	wt 25 µM TTM	wt 25 µM TTM	wt 25 µM TTM	wt 25 µM TTM	wt 25 µM TTM	wt 25 µM TTM	wt 25 µM TTM	wt 25 µM TTM	wt 25 µM TTM	wt 25 µM TTM	wt 25 µM TTM	wt 25 µM TTM	wt 25 µM TTM	wt 25 µM TTM	wt 25 µM TTM	wt 25 µM TTM	nrpcydAB DMSO	nrpcydAB DMSO	nrpcydAB DMSO	nrpcydAB DMSO	nrpcydAB DMSO	nrpcydAB DMSO	nrpcydAB DMSO	nrpcydAB DMSO	nrpcydAB DMSO	nrpcydAB DMSO	nrpcydAB DMSO	nrpcydAB DMSO
day 0	0	20.9																		20.9																		20.9
day 1	1	11.4	10.6	10.9	13.2	11.4	12.8	15.3	12.9	15.8	11.1	11.6	13.8	11.4	14.3	11.1	13.6	14.6	12.8	15	13.3	14.1	13.4	12.7	14.9	20.6	21.6	12.7	12.9	14.5	17.2	12.8	13.4	16.4	17.2	14.4	19.5	11.8	10.7	10.1	12.3	15.9	15.8	13.4	11.5	11.7	13.2	19	17.1
day 2	2	12.3	10.7	8.5	8.5	8.4	11.1	12.9	13	12.7	9.9	13.6	12	0.01	0.01	0.01	7.8	6.3	7.1	10.4	9.3	9.2	8.8	9.5	8.6	12.3	11.6	11.2	10.1	10.1	9.9	11.6	12.9	13.8	12	12.1	13.9	10.2	12.1	11.6	12.7	8.4	12.2	8.5	7.8	10.8	8.2	8.5	9.1
day 3	3							0.08	0.15	0.14	0.01	0.01	0.01	0.01	0.01	0.01	0.01	0.01	0.01							8.8	10	10	8.1	8.2	8.8	4.9	9.3	8	12.9	11.5	16.1							0.01	0.01	0.01	0.01	0.01	0.01
day 4	4	0.01	0.01	0.01	0.01	0.01	0.01	0.01	0.01	0.01	0.01	0.01	0.01	0.01	0.01	0.01	0.01	0.01	0.01	0.01	0.01	0.01	0.01	0.01	0.01	5.7	5.3	6.8	3.6	3.7	3.9	6.6	5.9	6.8	6.7	5.6	5.6	0.01	0.01	0.01	0.01	0.01	0.01	0.01	0.01	0.01	0.01	0.01	0.01
day 5	5	0.01	0.01	0.01	0.01	0.01	0.01	0.01	0.01	0.01	0.01	0.01	0.01	0.01	0.01	0.01	0.01	0.01	0.01	0.01	0.01	0.01	0.01	0.01	0.01	0.01	0.01	0.01	0.01	0.01	0.01	0.01	0.01	0.01	0.01	0.01	0.01	0.01	0.01	0.01	0.01	0.01	0.01	0.01	0.01	0.01	0.01	0.01	0.01
day 6	6	0.01	0.01	0.01	0.01	0.01	0.01	0.01	0.01	0.01	0.01	0.01	0.01	0.01	0.01	0.01	0.01	0.01	0.01	0.01	0.01	0.01	0.01	0.01	0.01	0.01	0.01	0.01	0.01	0.01	0.01	0.01	0.01	0.01	0.01	0.01	0.01	0.01	0.01	0.01	0.01	0.01	0.01	0.01	0.01	0.01	0.01	0.01	0.01
[truncated: 57 more columns]

## Sheet: Figure3E
	WT+vector	WT+vector	WT+vector	WT+vector	WT+vector	WT+vector	nrpcydAB+vector	nrpcydAB+vector	nrpcydAB+vector	nrpcydAB+vector	nrpcydAB+vector	nrpcydAB+vector	nrpcydAB+nrp	nrpcydAB+nrp	nrpcydAB+nrp	nrpcydAB+nrp	nrpcydAB+nrp	nrpcydAB+nrp	nrpcydAB+cydAB	nrpcydAB+cydAB	nrpcydAB+cydAB	nrpcydAB+cydAB	nrpcydAB+cydAB	nrpcydAB+cydAB
DMSO	11.9297	11.7666	14.4739	13.8521	12.1417	10.4808	11.4066	11.7357	16.4954	15.7955	13.91	13.6997	14.1852	13.8083	15.3402	14.9937	13.9057	13.8842	12.4612	12.2109	17.4706	17.7424	12.631	13.0945
20µM TTM	11.2963	11.4529	14.0306	14.6197	9.56067	9.11788	10.2484	10.2769	12.9317	14.7885	11.6241	10.7171	12.0509	13.0931	14.3958	13.6035	11.4737	11.1168	10.6613	10.7724	15.1054	15.7289	10.9449	10.6139
40µM TTM	9.1932	8.8106	10.8555	10.688	6.96637	6.8272	4.94491	3.76102	5.36819	5.05175	4.73187	4.59657	6.64855	6.46808	5.95638	6.08667	5.9767	5.07594	6.68465	6.69548	8.37988	8.1863	6.56431	6.66096
100nM Q203	8.73981	9.09099	8.72804	8.88036	4.12076	4.18347	1.17665	1.07528	1.41689	1.6188	0.81161	0.71938	1.50974	1.53508	1.38855	1.33188	0.80423	0.771027	5.82171	5.78913	6.1068	5.89072	3.9031	3.80718

## Sheet: Figure3F
	ctaD+ctaDALFA	ctaD+ctaDALFA	ctaD+ctaDALFA	ctaD+ctaDALFA	ctaD+ctaDALFA	ctaD+ctaDALFA	nrpctaD+ctaDALFA	nrpctaD+ctaDALFA	nrpctaD+ctaDALFA	nrpctaD+ctaDALFA	nrpctaD+ctaDALFA	nrpctaD+ctaDALFA
DMSO	1	0.889858	1	0.942715	1	1.14609	0.96687	1.25636	0.921672	0.901628	0.969061	1.2013
1mM BCS	1.52326	1.08329			1.01544	1.06172	1.17567	1.01559			0.957768	1.01108
40µM TTM	1.41291	0.950354	0.850258	0.947505	1.33008	1.15124	0.765047	0.961818	1.03914	0.789335	0.951026	1.02518
