# Supplementary material for: Chalkophore-mediated respiratory oxidase flexibility controls M. tuberculosis virulence
Source: eLife. 2025 Jun 5;14:RP105794. doi: 10.7554/eLife.105794 (PMC12140626; doi:10.7554/eLife.105794)
Supplement: Figure 4—figure supplement 1—source data 1. [file elife-105794-fig4-figsupp1-data1.xlsx]

## Sheet: A
WT day7	ΔnrpΔcydAB isotype day7	ΔnrpΔcydAB anti-Ly6G day7	WT day14	ΔnrpΔcydAB day14	ΔnrpΔcydAB isotype day14	ΔnrpΔcydAB anti-Ly6G day14
0.5	0.34	0.00454	2.43	2.38	2.41	0.21
0.84	0.19	0.04	2.94	2.75	0.91	0.21
1.53	0.62	0.084	0.86	1.21	1.28	0.042
0.53	0.81	0.065	3.06	1.29	1.43	0.034
0.56	0.49	0.00376		2.23	2.65

## Sheet: B
	Day post infection	WT	nrpcydAB
WT	29	1
WT	29	1
WT	29	1
WT	29	1
WT	33	1
WT	33	1
WT	33	1
WT	33	1
WT	33	1
nrpcydAB	188		0
nrpcydAB	188		0
nrpcydAB	188		0
nrpcydAB	188		0
nrpcydAB	188		0
nrpcydAB	188		0
nrpcydAB	188		0
nrpcydAB	188		0
nrpcydAB	188		0
nrpcydAB	188		0
