# Supplementary material for: Chalkophore-mediated respiratory oxidase flexibility controls M. tuberculosis virulence
Source: eLife. 2025 Jun 5;14:RP105794. doi: 10.7554/eLife.105794 (PMC12140626; doi:10.7554/eLife.105794)
Supplement: Figure 4—source data 1. [file elife-105794-fig4-data1.xlsx]

## Sheet: Figure4A
	day	WT	WT	WT	WT	WT	WT	WT	WT	WT	WT	WT	WT	WT	WT	nrp	nrp	nrp	nrp	nrp	nrp	nrp	nrp	nrp	nrp/cydAB+vector	nrp/cydAB+vector	nrp/cydAB+vector	nrp/cydAB+vector	nrp/cydAB+vector	nrp/cydAB+nrp	nrp/cydAB+nrp	nrp/cydAB+nrp	nrp/cydAB+nrp	nrp/cydAB+nrp
Day1	1	46	40	32	40	22	36		16	32	4	8	18			26	40	30	18	24	12	30			20	26	26	20	20	38	10	36	50	34
Day7	7	2000	3000	4600	1600	1600	6400	800	3400	1400	1340	3400	2800	920		2000	340	2000	380	3000	400	1400	600		100	40	140	20	60	5400	3400	3000	1200	3200
Day14	14	320000	580000	580000	340000	480000	520000	340000	640000	1320000	220000	360000	740000	500000	840000	32000	72000	36000	68000	22000	24000	42000	24000	54000	400	20	380	13600	2000	980000	1420000	1080000	800000	260000
Day21	21	8200000	2800000	2200000	10000000	3200000	800000	5400000	3400000	400000	2200000	1400000	1400000	1000000		400000	120000	520000	280000	380000	520000	160000	320000		15000	26400	6600	19400	10600	4200000	20000000	5200000	1260000	5000000
Day56	56	800000	300000	340000	440000	540000	140000	220000	200000	500000	240000	500000	100000	660000		160000	84000	96000	12000	140000	280000	180000	140000		68000	10800	76000	66000	32000	164000	178000	152000	162000	440000
Day 112	112	2400000	320000	1460000	220000	640000	100000	540000	700000	1020000	280000	520000	540000	200000		8000	46000	42000	140000	70000	96000	146000	74000		18000	76000	160000	520000	160000	360000	300000	180000	110000	420000

## Sheet: Figure4B
	day	WT	WT	WT	WT	WT	WT	WT	WT	WT	WT	WT	WT	WT	WT	nrp	nrp	nrp	nrp	nrp	nrp	nrp	nrp	nrp	nrp/cydAB+vector	nrp/cydAB+vector	nrp/cydAB+vector	nrp/cydAB+vector	nrp/cydAB+vector	nrp/cydAB+nrp	nrp/cydAB+nrp	nrp/cydAB+nrp	nrp/cydAB+nrp	nrp/cydAB+nrp
Day7	7	1	1	1	1	1	4	4	4	4	4	4	4	4		4	4	4	4	4	4	4	4		1	1	1	1	1	1	1	1	1	1
Day14	14	4800	1900	200	600	2900	11000	70	23000	500	3800	8000	4100	160	2300	9		9	90	9	9	9	10	9	9	9	9	9	9	18000	3400	32000	90	100
Day21	21	220000	150000	33000	59000	49000	210000	500000	360000	80000	230000	280000	210000	700000		1400	1400	4000	600	700	900	27000	9		10	20	9	20	9	82000	770000	200000	10000	8000
Day56	56	60000	70000	113000	110000	73000	60000	70000	70000	90000	50000	50000	50000	160000		6000	1300	500	5000	5000	3000	1400	1000		200	10	10	70	170	51000	62000	26000	7000	92000
Day 112	112	250000	130000	280000	130000	140000	60000	40000	180000	60000	360000	160000	180000	130000		900	6000	1000	2000	2300	3100	2800	3800		10	30	120	440	160	83000	150000	70000	10*	120000

## Sheet: Figure4C
	day	WT	WT	WT	WT	WT	WT	WT	WT	WT	WT	WT	WT	WT	WT	nrp	nrp	nrp	nrp	nrp	nrp	nrp	nrp	nrp	nrp/cydAB+vector	nrp/cydAB+vector	nrp/cydAB+vector	nrp/cydAB+vector	nrp/cydAB+vector	nrp/cydAB+nrp	nrp/cydAB+nrp	nrp/cydAB+nrp	nrp/cydAB+nrp	nrp/cydAB+nrp
Day7	7	1	1	1	1	1	4	4	4	4	4	4	4	4		4	4	4	4	4	4	4	4		1	1	1	1	1	1	1	1	1	1
Day14	14	4800	1900	200	600	2900	11000	70	23000	500	3800	8000	4100	160	2300	9		9	90	9	9	9	10	9	9	9	9	9	9	18000	3400	32000	90	100
Day21	21	220000	150000	33000	59000	49000	210000	500000	360000	80000	230000	280000	210000	700000		1400	1400	4000	600	700	900	27000	9		10	20	9	20	9	82000	770000	200000	10000	8000
Day56	56	60000	70000	113000	110000	73000	60000	70000	70000	90000	50000	50000	50000	160000		6000	1300	500	5000	5000	3000	1400	1000		200	10	10	70	170	51000	62000	26000	7000	92000
Day 112	112	250000	130000	280000	130000	140000	60000	40000	180000	60000	360000	160000	180000	130000		900	6000	1000	2000	2300	3100	2800	3800		10	30	120	440	160	83000	150000	70000	10*	120000

## Sheet: Figure4D
Day	WT	WT	WT	WT	WT	nrpcydAB untreated	nrpcydAB untreated	nrpcydAB untreated	nrpcydAB untreated	nrpcydAB untreated	nrpcydAB isotype cntrl	nrpcydAB isotype cntrl	nrpcydAB isotype cntrl	nrpcydAB isotype cntrl	nrpcydAB isotype cntrl	nrpcydAB anti-ly6g	nrpcydAB anti-ly6g	nrpcydAB anti-ly6g	nrpcydAB anti-ly6g	nrpcydAB anti-ly6g
7	4	4	4	4	4	4	4	4	4	4	4	4	4	4	4	4	4	4	4	4
14	32500	120	20900	130	28100	4	4	4	4		4	4		4	4	4	100	4	4	4
21	150000	2100000	1560000	410000	22000	10	850	10	210	30	520	180	10	10	30	100	80	10	10	30

## Sheet: Figure4E
Day	WT/blk6	WT/blk6	WT/blk6	WT/blk6	WT/blk6	WT/scid	WT/scid	WT/scid	WT/scid	WT/scid	nrpcydAB/blk6	nrpcydAB/blk6	nrpcydAB/blk6	nrpcydAB/blk6	nrpcydAB/blk6	nrpcydAB/scid	nrpcydAB/scid	nrpcydAB/scid	nrpcydAB/scid	nrpcydAB/scid
1	134	118	94	76	106	112	118	128	122		104	78	94		88	98	68	82	112	70
7	3200	5200	8000	2200	14000	6000	5000	3800	1800	800	780	1020	2200	760	1100	580	600	1340	420	260
14	2600000	8400000	3800000	2400000	4200000	4000000	2600000	3400000	4200000	6000000	1800	24000	4800	3200	7400	3800	1400	3600	1800	10200
21	44000000	14000000	46000000	10000000	16000000	100000000	400000000	1000000000	80000000	400000000	20000	26000	60000	2000	48000	54000	8000	14000	36000	3800

## Sheet: Figure4F
Day	WT/blk6	WT/blk6	WT/blk6	WT/blk6	WT/blk6	WT/scid	WT/scid	WT/scid	WT/scid	WT/scid	nrpcydAB/blk6	nrpcydAB/blk6	nrpcydAB/blk6	nrpcydAB/blk6	nrpcydAB/blk6	nrpcydAB/scid	nrpcydAB/scid	nrpcydAB/scid	nrpcydAB/scid	nrpcydAB/scid
7	3	3	3	3	3	3	4	3	16	3	3	3	3	3	3	3	3	3	3	3
14	43000	5000	12000	1000		11000	90	10000	14000	29000	9	9	30		9	9	9	9	10	9
21	200000	200000	900000	700000	18000	700000	460000	1600000	4500000	1100000	10	30	260	9	200	210	50	10	110	10
