# Supplementary material for: Chalkophore-mediated respiratory oxidase flexibility controls M. tuberculosis virulence
Source: eLife. 2025 Jun 5;14:RP105794. doi: 10.7554/eLife.105794 (PMC12140626; doi:10.7554/eLife.105794)
Supplement: Supplementary file 1. [file elife-105794-supp1.xlsx]

## Sheet: Supplementary File 1 Strains
Supplementary File 1 Strains
Strain ID	Name	Genotype	Plasmid	Reference
E.coli
DH5α	DH5α	Standard Molecular Cloning Strain		Laboratory Stock
M.tuberculosis
EG2	EG2	Wild Type M.tuberulosis Erdman Strain Animal Passaged		Laboratory Stock
MGM343	EG2 + Vector	Wild Type M.tuberulosis Animal Passaged	pMV306K	Makinoshima et al. (2005)
MGM345	EG2 + Vector	Wild Type M.tuberulosis Animal Passaged	pMV261K	Makinoshima et al. (2005)
JAB100	Δnrp	nrp::hygR	None	Buglino JA et al. (2022)
JAB101	Δnrp + Vector	nrp::hygR	pMV306K	Buglino JA et al. (2022)
JAB103	Δnrp loxP	nrp::loxP		This Study
JAB110	ΔfadD10	fadD10::hygR		Buglino JA et al. (2022)
JAB127	Δnrp +nrp	nrp::hygR	pJAB823	This Study
JAB128	ΔnrpΔcydAB	nrp::loxP cydAB::hygR		This Study
JAB129	ΔnrpΔcydAB + Vector	nrp::loxP cydAB::hygR	pMV306K	This Study
JAB130	ΔnrpΔcydAB + nrp	nrp::loxP cydAB::hygR	pJAB823	This Study
JAB131	ΔnrpΔcydAB + cydABDC	nrp::loxP cydAB::hygR	pJAB900	This Study
JAB133	ΔnrpΔctaD + Vector	nrp::loxP ctaD::hygR	pMV306K	This Study
JAB134	ΔnrpΔctaD + ctaDALFA	nrp::loxP ctaD::hygR	pJAB863	This Study
JAB135	ΔnrpΔctaD + nrp	nrp::loxP ctaD::hygR	pJAB823	This Study
JAB136	ΔcydAB	cydAB::hygR		This Study
JAB137	ΔcydAB + Vector	cydAB::hygR	pMV306K	This Study
JAB138	ΔctaD + Vector	ctaD::hygR	pMV306K	This Study
JAB139	ΔctaD+ctaDALFA	ctaD::hygR	pJAB863	This Study
JAB140	ΔfadD10 loxP	fadD10::loxP		This Study
JAB141	ΔfadD10ΔcydAB	fadD10::loxP cydAB::hygR		This Study
