# Supplementary material for: Chalkophore-mediated respiratory oxidase flexibility controls M. tuberculosis virulence
Source: eLife. 2025 Jun 5;14:RP105794. doi: 10.7554/eLife.105794 (PMC12140626; doi:10.7554/eLife.105794)
Supplement: Supplementary file 2. [file elife-105794-supp2.xlsx]

## Sheet: Supplementary File 2-PlasmidsSu
Supplementary File 2-Plasmids
Plasmid ID	Name	Vector	Insert	Relavent Features
pMV306K	pMV306K	pMV306K	None	attP integrating mycobacterial expression vector KanR
pMV306S	pMV306K	pMV306K	None	attP integrating mycobacterial expression vector StrepR
pJAB823	pMV306K WT nrp Edman	pMV306K	AA 1-2512 nrp Erdman	attP integrated HSP60 promoter
pJAB863	pMV306K ctaD ALFA	pMV306K	310bp 5' of ctaD start codon to AA 573 of ctaD C-terminal ALFA tag Fusion	attP integrated native promoter
pJAB900	pMV306K cydABDC	pMV306K	330bp 5' of cydA start codon to stop condon of cydC	attP integrated native promoter
pmsg360Hyg	pmsg360Hyg	pmsg360Hyg	none	double crossover recombination phage packaging vector
pJAB806	nrp KO Vector	pmsg360Hyg	621bp 5' of nrp AA 8 + 621bp 3' nrp AA 2505. Targets Nrp AA 8-2505 for replacement with Hyg cassette
pJAB822	fadD10 KO Vector	pmsg360Hyg	680bp 5' of FadD10 AA59 + 531bp 3' FadD10 AA517 Targets amino acid 59-517 of FadD10 for replacement with Hyg cassette.
pJAB801	cydAB KO Vector	pmsg360Hyg	645bp 5' of cydA start codon + 713bp 3' of cydB stop codon. Targets full conding seq of cydA and B for replacement with Hyg cassette.
pJAB842	ctaD KO Vector	pmsg360Hyg	701bp 5' of ctaD AA 39 + 639 bp 3' of ctaD Stop codon. Targets AA 39-ctaD stop codon for replacement with Hyg cassette.
