# Supplementary figures and images for: Chalkophore-mediated respiratory oxidase flexibility controls M. tuberculosis virulence
Source: eLife journal article supplement (doi:10.7554/elife.105794), 2025-02-20

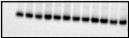

ALFA

Supplement: fig3-figsupp1-data1 [file elife-105794-fig3-figsupp1-data1-v1.zip]

# RpoB

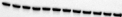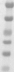

Supplement: fig3-figsupp1-data1 [file elife-105794-fig3-figsupp1-data1-v1.zip]
